# Supplementary material
Source: publisher site journal article supplement (http://scielo.br/pdf/rbef/v46s1/1806-9126-rbef-46-suppl1-e20240132.pdf)
Supplement: Supplementary file 1 [file 1806-9126-rbef-46-suppl1-e20240132.pdf]

# Técnicas de luz síncrotron em magnetismo: uma visão geral

## Synchrotron light techniques in magnetism: an overview

Thiago J. A. Mori<sup>\*1</sup>

<sup>1</sup>Centro Nacional de Pesquisa em Energia e Materiais, Laboratório Nacional de Luz Síncrotron, Campinas, SP, Brasil.

Recebido em 18 de abril de 2024. Aceito em 01 de maio de 2024.

A interação entre a radiação eletromagnética e a matéria oferece uma oportunidade para investigar as propriedades dos materiais em escala atômica e subatômica. Os raios X, em particular, tem sido amplamente utilizados devido à sua capacidade de sondar a estrutura atômica, eletrônica e magnética dos materiais. O advento dos aceleradores de partículas do tipo síncrotron revolucionou a pesquisa nessa área. Proporcionando fontes de raios X intensas e altamente focalizadas, com coerência espacial e temporal em uma ampla faixa de energia, essas instalações permitiram o desenvolvimento de uma ampla gama de técnicas experimentais, incluindo espectroscopias, microscopias e espalhamento de raios X. No contexto do minicurso ministrado na XI Escola Brasileira de Magnetismo, este artigo fornece uma visão geral das técnicas de luz síncrotron mais utilizadas atualmente para o estudo de materiais magnéticos, destacando suas aplicações, princípios de funcionamento e contribuições para o avanço do conhecimento na área.

**Palavras-chave:** Escola Brasileira de Magnetismo, Luz Síncrotron, Dicroísmo Magnético, Microscopia de raios X, Espalhamento de raios X.

The interaction between electromagnetic radiation and matter provides an opportunity to investigate the properties of materials at atomic and subatomic scales. Specifically, X-rays have been widely used due to their ability to probe the atomic, electronic, and magnetic structure of materials. The advent of synchrotron particle accelerators has revolutionized research in this field. By providing intense and highly focused X-ray sources, with spatial and temporal coherence over a wide energy range, these facilities have enabled the development of a wide range of experimental techniques, including spectroscopies, microscopies, and X-ray scattering. In the context of the mini-course held at the XI Brazilian School of Magnetism, this article provides an overview of the most commonly used synchrotron light techniques for studying magnetic materials, highlighting their applications, basic principles, and contributions to advancing knowledge in the field.

**Keywords:** Brazilian School of Magnetism, Synchrotron Light, Magnetic Dichroism, X-ray Microscopy, X-ray Scattering.

## 1. Introdução

O magnetismo é um fenômeno fascinante que desempenha um papel central em uma ampla gama de áreas científicas e tecnológicas, desde o armazenamento de dados até a medicina. A compreensão das propriedades magnéticas dos materiais é fundamental para o desenvolvimento de novos dispositivos e tecnologias, e também para avançar nosso conhecimento fundamental sobre a natureza dos materiais.

A interação entre a radiação eletromagnética e a matéria oferece uma oportunidade única para investigar as propriedades dos materiais em escalas atômicas e subatômicas. Para nossa sorte, os raios X interagem fortemente com os elétrons, proporcionando informações sobre a estrutura atômica e eletrônica do material. Como os elétrons possuem momento angular, também podemos utilizar os raios X para sondar propriedades magnéticas. Com o desenvolvimento dos aceleradores de partículas do tipo síncrotron, a pesquisa nessa área experimentou

um avanço significativo nas últimas décadas. As técnicas baseadas em luz síncrotron emergiram como ferramentas poderosas para o estudo do magnetismo, oferecendo uma grande variedade de métodos para investigar propriedades estruturais, eletrônicas e magnéticas.

A luz síncrotron é gerada por partículas aceleradas, como elétrons, mantidas em movimento controlado em anéis de armazenamento de alta energia. Esses aceleradores produzem feixes de radiação eletromagnética de alta intensidade e altamente focalizados, cobrindo uma ampla faixa de energias, desde o infravermelho até os raios X. A radiação síncrotron possui características únicas, incluindo alto brilho, polarização ajustável e feixe altamente colimado, sendo ideal para uma grande variedade de aplicações em ciência dos materiais.

Entre as técnicas de luz síncrotron mais relevantes para o estudo do magnetismo, destacam-se a espectroscopia de absorção de raios X e suas variações baseadas no dicroísmo circular ou linear de raios X. Essas técnicas fornecem informações valiosas sobre transições eletrônicas que estão por trás da origem do magnetismo nos materiais, e sobre o ordenamento magnético, com

\*Endereço de correspondência: [thiago.mori@lnls.br](mailto:thiago.mori@lnls.br)

seletividade química. Desta forma, é possível sondar átomos específicos de forma individual dentro da estrutura do composto de interesse.

Enquanto técnicas de microscopia baseadas em luz síncrotron utilizam o contraste proporcionado pela absorção de raios X para fornecer uma visualização direta dos domínios magnéticos, métodos baseados em espalhamento e difração ressonante de raios X proporcionam uma visão do ordenamento atômico e magnético no espaço recíproco. Com este conjunto de possibilidades, é possível caracterizar domínios magnéticos individuais, interfaces em heteroestruturas, além de estudar excitações magnéticas e eletrônicas com seletividade química. Além disso, essas técnicas fornecem “insights” importantes sobre a dinâmica das correlações eletrônicas em sistemas de elétrons fortemente correlacionados.

Compreender o funcionamento e as capacidades das técnicas baseadas em luz síncrotron é essencial para os pesquisadores da área de magnetismo. Neste contexto, este artigo fornece uma visão geral das técnicas mais relevantes para o estudo de materiais magnéticos, destacando suas aplicações, princípios de funcionamento e possíveis contribuições para o avanço do conhecimento da área.

## 2. Espectroscopia de Absorção de Raios X

Uma medida de espectroscopia de absorção de raios X (“X-ray absorption spectroscopy”, XAS), conforme exemplo na Figura 1, mostra um sinal de intensidade proporcional ao coeficiente de absorção em função da energia dos fótons incidentes. Variações (às vezes picos) ocorrem em determinadas energias quando um elétron ligado a um nível próximo do núcleo - em um nível de caroço, é excitado para um estado vazio próximo à energia de Fermi, por absorção do fóton de raios X. Uma característica importante do XAS é a seletividade química, pois as energias dessas transições são características de cada átomo e dependem fortemente do ambiente químico em torno do átomo absorvedor. Em uma aproximação, o espectro de XAS é proporcional à densidade de estados (DOS) dos orbitais desocupados projetada no átomo absorvedor. Assim, a técnica é

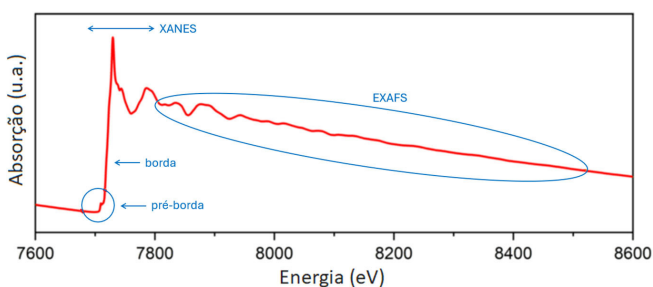

**Figura 1:** Espectro de absorção de raios X em torno da borda K do Co, com indicação das regiões de pré-borda, XANES e EXAFS.

poderosa para investigar a estrutura eletrônica de metais de transição ou terras-raras selecionados em materiais de interesse. Por exemplo, em moléculas, o XAS pode sondar elementos da estrutura geométrica e eletrônica dos sítios magnéticos. Em compostos de metais de transição  $3d$ , o XAS na borda  $L$  reflete informações detalhadas sobre os orbitais  $3d$  e as propriedades da ligação entre o metal central e os ligantes vizinhos.

No processo de absorção de raios X, o estado inicial  $|i\rangle$  é excitado para o estado final  $|f\rangle$  pela absorção de um fóton incidente com energia  $\hbar\omega_{\text{in}}$ . Os diferentes níveis de caroço de onde o elétron pode sair proporcionam várias bordas de absorção. Por exemplo, no cátion  $\text{Co}^{2+}$ , o estado inicial ( $2p^6 3d^7$ ) é excitado para o estado final ( $2p^5 3d^8$ ), onde um elétron do nível de caroço  $2p$  é transferido para um orbital  $3d$  originalmente vazio, deixando um buraco nos níveis  $2p$ . Tal transição é chamada de borda de absorção  $L$ , pois o elétron que a originou saiu da camada  $L$ . Devido ao acoplamento spin-órbita nos níveis  $2p$ , que quebra a degenerescência destes orbitais em  $2p_{3/2}$  e  $2p_{1/2}$ , a transição  $2p \rightarrow 3d$  se subdivide nas bordas  $L_3$  e  $L_2$ , respectivamente. Por sua vez, se o elétron envolvido sair do orbital  $1s$ , a transição é chamada de borda  $K$ . Considerando apenas o operador de transição dipolar de primeira ordem, o qual é apropriado na maioria dos casos, a regra de seleção dipolar controla a transição permitida do elétron excitado, permitindo as seguintes transições:

$$\Delta L = 0, \pm 1 \quad (L \neq 0) \quad \text{ou} \quad \Delta L = \pm 1 \quad (L = 0), \quad (1)$$

$$\Delta S = 0, \quad (2)$$

$$\Delta n \neq 0, \quad (3)$$

onde  $n$ ,  $L$  e  $S$  são os números quânticos principal, secundário e de spin. Seguindo a Regra de Ouro de Fermi, a intensidade da transição do estado inicial para o final pode ser escrita como:

$$I(\omega_{\text{in}}) = C_0 \cdot \omega_{\text{in}}^3 |\langle f | \vec{e} \cdot \vec{r} | i \rangle|^2 \delta(E_f - E_i - \hbar\omega_{\text{in}}), \quad (4)$$

onde  $C_0$  é uma constante e  $E_i$ ,  $E_f$  representam a energia dos estados inicial  $|i\rangle$  e final  $|f\rangle$ . O termo  $\delta$  vem da lei de conservação de energia e determina as energias onde ocorrem as transições eletrônicas. As funções de onda dos estados inicial e final podem ser calculadas a partir de vários métodos, e a escolha depende de qual o tipo de transição. Por exemplo, a teoria de multipletos resolve o problema de maneira bastante precisa e eficiente para transições  $2p \rightarrow 3d$  em compostos de metais como Co, Fe e Ni [1, 2].

Analisando mais detalhadamente o espectro de absorção de raios X, costuma-se separá-lo em três regiões diferentes (veja indicações na Figura 1). Primeiro, quando a transição alcança os estados desocupados mais baixos em torno da energia de Fermi, o XAS está no limiar de absorção e uma borda crescente começa a aparecer no espectro. Esta região, conhecida como pré-borda, não permite transições dipolares, mas contribui para a

absorção através de operadores de quadrupolo de baixa intensidade, como a transição  $1s \rightarrow 4d$  em bordas  $K$ , que não discutiremos em detalhes neste artigo. A segunda região do XAS é onde se encontram as principais informações relacionadas ao magnetismo. Essa região é chamada de estrutura de absorção de raios X próxima à borda (“X-ray absorption near-edge spectroscopy”, XANES) ou estrutura fina de absorção de raios X próxima à borda (“near-edge X-ray absorption fine structure”, NEXAFS) [3]. As intensidades características do XANES são muito maiores que as da região da pré-borda, uma vez que são permitidas transições dipolares. Quando a energia do fóton incidente está acima da borda de absorção, há uma estrutura fina que aparece como uma modulação oscilatória do coeficiente de absorção que, quando presente, é dependente de informações como distâncias atômicas, número de coordenação, e vizinhança química do átomo absorvedor. Esta região é chamada de estrutura fina de absorção de raios X estendida (“extended X-ray absorption fine-structure”, EXAFS). Na sequência deste artigo, focaremos na região do XANES. O espectro XANES pode detectar os estados de valência e de spin do metal de transição ou terrarara, e também determina com precisão a simetria da estrutura local do sítio metálico ativo.

Ao realizar uma medida de espectroscopia de absorção de raios X com aplicação de campo magnético externo, pode-se observar uma diferença no coeficiente de absorção entre espectros obtidos com diferentes polarizações da luz incidente. Quando esse fenômeno é observado com feixe de raios X linearmente polarizado com diferentes orientações do vetor campo elétrico em relação ao eixo de spin da amostra, é chamado de dicroísmo magnético linear de raios-X (“X-ray magnetic linear dichroism”, XMLD) [4]. Por sua vez, quando é observado com feixe de raios X polarizado circularmente com helicidade esquerda ou direita, é chamado de dicroísmo circular magnético de raios X (“X-ray magnetic circular dichroism”, XMCD) [5]. A origem dos efeitos de dicroísmo está nas anisotropias do estado de carga ou de spin no material, que determinam a interação com o campo elétrico polarizado da radiação eletromagnética. O XMCD é a melhor ferramenta para estudar as propriedades magnéticas de materiais ferromagnéticos, enquanto o XMLD é mais adequado para sondar materiais antiferromagnéticos. Através da comparação de espectros de absorção obtidos com feixes de diferentes polarizações, o XMCD e o XMLD permitem investigar a composição elementar, número de buracos e valência, anisotropias de carga, direção e quantificação de momento angular orbital e de spin. Na sequência, focaremos em aplicações e exemplos de XMCD em materiais ferromagnéticos, e em técnicas de microscopia e espalhamento que utilizam o contraste do XMCD como princípio para investigar o ordenamento ferromagnético nos espaços real e recíproco. De forma análoga, o contraste de XMLD também permite obter o mesmo tipo de informação para materiais antiferromagnéticos.

## 2.1. Dicroísmo circular magnético de raios X

Quando se calcula a diferença entre os espectros medidos com polarização circular esquerda e direita, mede-se o dicroísmo circular, o XMCD. Estes espectros podem ser analisados de forma quantitativa e, usando regras de soma, em muitos casos é possível separar os momentos magnéticos orbital e de spin com seletividade química. As regras de soma de XMCD foram derivadas teoricamente no início da década de 1990 a partir de regras de soma de magneto-óptica [6], e se baseiam em integrais da soma e diferença entre os espectros de XANES obtidos com diferentes polarizações. Com o trabalho experimental de Chen et al. [7], onde um cuidado especial com os artefatos experimentais foi tomado, sua validade foi comprovada.

Considerando o caso das bordas  $L_3$  e  $L_2$  de metais de transição  $3d$ , como a apresentada na Figura 2, existem quatro estados iniciais  $p_{3/2}$  correspondentes à borda  $L_3$  e dois estados  $p_{1/2}$  correspondentes à borda  $L_2$ . É possível mostrar que a probabilidade de transição não é a mesma para a parte orbital e de spin nestas bordas de absorção [6–8]. Também usamos o fato de que os estados  $3d$  são bastante localizados. Isso significa que eles se espalham por uma faixa pequena de energia e, assim, é possível integrar uma região espectral contendo todos os estados  $3d$  vazios. Ao medir o coeficiente de absorção sondamos os estados desocupados. A ideia é que, pela integração de um espectro, se mede o número de estados desocupados por unidade de elétron, e assim os estados ocupados são dados pela diferença com o número total de elétrons por átomo em uma banda  $3d$ , ou seja, 10. Antes de realizar a integração de um espectro XANES é preciso subtrair o “background” devido à absorção por outros estados, o que é feito utilizando uma função de duplo degrau, com cada altura igual à absorção após cada uma das bordas. A partir destas considerações, são obtidas duas equações para os momentos orbital  $m_l$  e de spin  $m_s$ . A forma simplificada destas regras de soma é a seguinte:

$$m_{orb} = N_H \frac{4q}{3r}, \quad (5)$$

$$m_{spin} = N_H \frac{6p - 4q}{r}, \quad (6)$$

onde  $N_H$  é o número de estados  $3d$  vazios (buracos), e  $p$ ,  $q$  e  $r$  são valores tomados das integrais dos espectros de absorção isotrópica (soma das medidas com polarização circular positiva e negativa, i.e.  $\mu^+ + \mu^-$ ) e XMCD ( $\mu^+ - \mu^-$ ). A Figura 2(b-c) mostra uma representação gráfica das integrais dos espectros, com indicação dos valores extraídos para  $p$ ,  $q$  e  $r$ . Uma dedução mais aprofundada das regras de soma do XMCD, e discussão sobre correções experimentais necessárias para correta quantificação de espectros, podem ser encontradas nas referências [6, 7].

O exemplo ilustrado na Figura 2 demonstra a aplicação das regras de soma para estimativa dos momentos orbital e de spin em multicamadas magnéticas baseadas

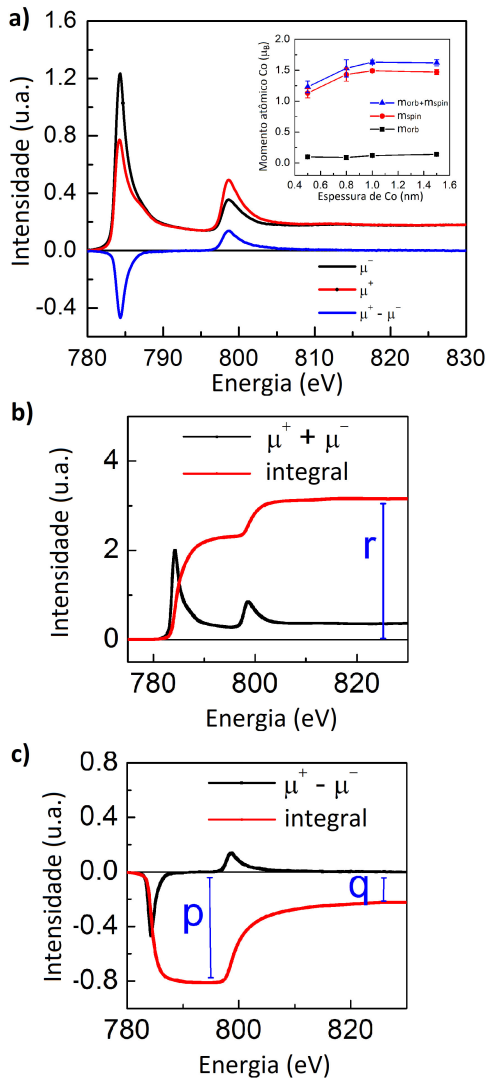

**Figura 2:** (a) Espectros de absorção e XMCD em torno das bordas  $L_3$  e  $L_2$  do Co, de multicamadas magnéticas compostas por camadas alternadas de Co e Pt. São apresentados espectros obtidos com feixe de raios X com polarização circular direita ( $\mu^+$ , vermelho), esquerda ( $\mu^-$ , preto) e o espectro de XMCD (azul). O “inset” da figura mostra a quantificação dos momentos orbital ( $m_{orb}$ ) e de spin ( $m_{spin}$ ) dos átomos de Co neste material, obtida a partir da aplicação das regras de soma do XMCD. (b) Espectro de absorção isotrópico, que é igual à soma  $\mu^+ + \mu^-$ , e sua integral com indicação do parâmetro  $r$  utilizado nas regras de soma. (c) Espectro de XMCD, que é igual à diferença  $\mu^+ - \mu^-$ , e sua integral com indicação dos parâmetros  $p$  e  $q$ . Figura extraída e modificada, com autorização, da referência [9].

em Co metálico [9]. Como a medida foi realizada na borda de absorção do Co, os dados extraídos vêm apenas dos átomos de Co. Neste exemplo, medidas do momento total em magnetômetros convencionais eram insuficientes para compreender o efeito de proximidade magnético que impõe uma magnetização não-nula aos átomos de Pt em interfaces Co/Pt. A possibilidade de medir o momento atômico com seletividade química foi

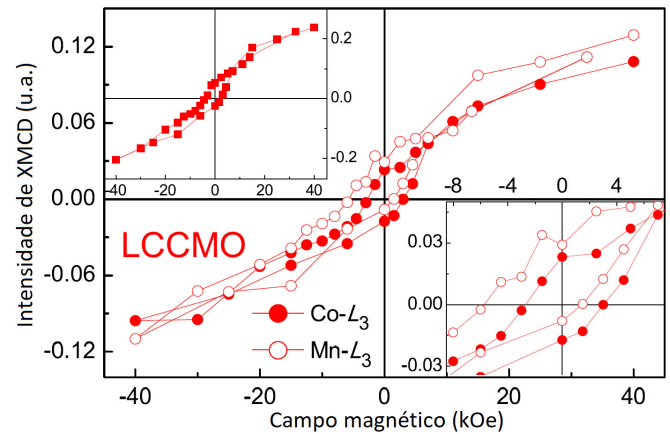

**Figura 3:** Curvas de histerese do sinal de XMCD medido com energia incidente nas bordas de absorção  $L_3$  do Co e do Mn, de uma amostra de  $\text{La}_{1,5}\text{Ca}_{0,5}\text{CoMn}_2\text{O}_6$ . O “inset” superior mostra a soma das duas medidas, representando a curva de histerese média da amostra, e o “inset” inferior apresenta um zoom na região próxima aos campos coercivos, destacando a diferença na coercividade e no campo de “exchange bias” para os dois elementos magnéticos presentes no composto. Figura extraída e modificada, com autorização, da referência [10].

fundamental para caracterizar as propriedades magnéticas em interfaces de multicamadas com anisotropia magnética perpendicular.

Além da quantificação pelas regras de soma, a dependência do sinal de XMCD com a magnetização permite utilizar a técnica para medir curvas de histerese com seletividade química. Este experimento consiste em escolher uma energia incidente (normalmente um pico do espectro de XMCD) para manter fixa enquanto varre-se o campo magnético externo. No exemplo da Figura 3, a amostra de interesse é um óxido complexo com estrutura de perovskita dupla, que apresenta “exchange bias” instantâneo devido às interações de troca envolvendo os átomos de Co e Mn [10]. Enquanto magnetômetros convencionais fornecem apenas a medida da magnetização total do composto, curvas de histerese medidas por XMCD permitem medir de forma independente cada átomo magnético. O resultado mostrado na Figura 3 demonstra que Co e Mn apresentam diferentes coercividades e se comportam de forma distinta quando a amostra é submetida ao campo externo. Desta forma, os dados de XMCD foram fundamentais para compreender os mecanismos por trás das propriedades magnéticas exóticas deste sistema.

### 3. Microscopias de Raios X

Na seção 2 vimos que o processo de absorção de raios X permite sondar uma amostra com seletividade química. Além disso, o dicroísmo circular de raios X fornece uma medida quantitativa do momento atômico do átomo absorvedor. Como este sinal é proporcional à magnetização da amostra na região iluminada pelo feixe, o

XMCD pode ser usado como mecanismo de contraste para obtenção de imagens no espaço real através de técnicas de microscopia, e ordenamentos magnéticos no espaço recíproco através de técnicas de espalhamento de raios X. Dentre as diversas variações de técnicas de microscopia e espalhamento possíveis atualmente em linhas de luz modernas nos laboratórios de luz síncrotron, destacaremos as mais utilizadas pela comunidade da área.

### 3.1. Microscopia eletrônica de fotoemissão

A técnica de microscopia eletrônica de fotoemissão (“photoemission electron microscopy”, PEEM) consiste em capturar uma imagem dos fotoelétrons emitidos da superfície de um material, excitados por raios X [11]. Para isso, é necessário utilizar um microscópio que contém uma coluna e lentes para elétrons muito parecidas com as de um microscópio eletrônico de transmissão. A principal diferença é que no PEEM a imagem é gerada a partir dos fotoelétrons ejetados da superfície da amostra, e não de elétrons acelerados como em um microscópio eletrônico convencional. Se a energia do feixe de raios X for aleatória, o PEEM permite visualizar uma imagem com contraste da topografia da superfície. Por sua vez, a escolha da energia do fóton incidente coincidindo com bordas de absorção de elementos presentes no material permite obter imagens com contraste químico. No caso de materiais com formação de domínios magnéticos, é possível utilizar luz com polarização circular para utilizar o contraste do sinal de XMCD e, desta forma, obter imagens de domínios magnéticos com resolução nanométrica. Uma observação importante é que o PEEM, por ser uma técnica baseada em fotoemissão, é intrinsecamente sensível apenas à superfície, ou seja, os fotoelétrons que formam a imagem são gerados nos primeiros nm a partir da superfície da amostra.

### 3.2. Microscopia de raios X por transmissão

A microscopia de raios X por transmissão (“transmission X-ray microscopy”, TXM) é baseada na projeção da imagem da amostra magnificada em um detector. O feixe de raios X, normalmente com focalização divergente, ilumina toda a região de interesse em modo “full field” [12, 13]. O mecanismo de contraste é a absorção parcial dos fótons pela amostra. Ao escolher a energia da luz incidente de forma a coincidir com a borda de absorção de um elemento específico, regiões que possuam alta concentração deste elemento absorverão mais que outras onde o elemento aparece em menor quantidade. Por sua vez, em uma amostra de composição homogênea contendo um material magnético, a utilização de raios X polarizados circularmente proporciona um contraste sensível à magnetização devido ao dicroísmo circular, permitindo a visualização de domínios magnéticos no espaço real.

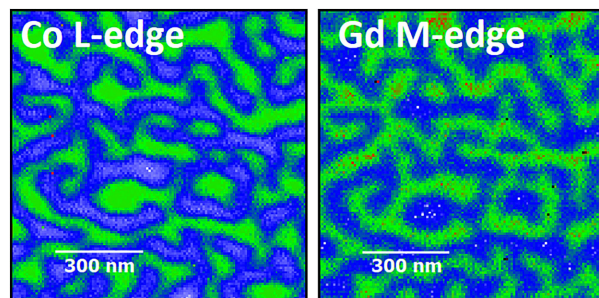

**Figura 4:** Imagens obtidas pela técnica de STXM, com contraste de XMCD, em uma mesma região de uma multicamada magnética composta por camadas de Co e Gd. A energia do feixe incidente coincide com a borda de absorção  $L_3$  do Co (esquerda) e  $M_5$  do Gd (direita). Nota-se que o contraste de XMCD apresenta sinal invertido entre as duas imagens, demonstrando que, apesar de o padrão de domínios ser o mesmo, o acoplamento entre as camadas é antiferromagnético.

Em uma variação da técnica, o feixe é focalizado através de lentes de raios X que conseguem atingir tamanhos de feixe em escala nanométrica e, consequentemente, resoluções espaciais desta ordem. Neste caso, a medida é realizada em modo de varredura (“scanning transmission X-ray microscopy”, STXM) [14, 15]. Comparando com a tradicional microscopia de força magnética (MFM), o STXM apresenta a vantagem de sondar diretamente o contraste da magnetização ao longo de toda profundidade da amostra, e não apenas da superfície como no caso do MFM. Além disso, o contraste da absorção de raios X proporciona a seletividade química. O exemplo da Figura 4 mostra imagens STXM obtidas com polarização circular (contraste de XMCD) para uma multicamada magnética composta por camadas de Co e Gd. Enquanto a Figura 4 (esquerda) mostra a imagem obtida com fótons na borda de absorção do Co, a Figura 4 (direita) mostra a imagem da mesma região obtida com energia do feixe incidente igual à borda de absorção do Gd. Nota-se claramente que as imagens apresentam a mesma morfologia, porém o contraste de cores é invertido. Esta observação permite concluir que, apesar de os domínios magnéticos das camadas de Co e Gd estarem perfeitamente alinhados, o acoplamento entre as camadas é antiferromagnético.

Para que seja possível realizar uma medida com raios X em transmissão, a amostra precisa ser suficientemente fina. Em energias baixas ( $\leq 2.000$  eV), faixa em que estão bordas de absorção  $L$  de metais  $3d$  e  $M$  de actinídeos como Gd, as espessuras máximas são micrométricas. No caso de filmes finos como o do exemplo apresentado acima, as amostras normalmente são depositadas sobre substratos com boa transparência a raios X, como membranas ultrafinas de  $\text{Si}_3\text{N}_4$ . Se a preparação de amostra para transmissão é inviável, ou então se o caso científico envolve o estudo de propriedades magnéticas de superfícies com seletividade química e contraste de XMCD, uma possibilidade é utilizar a microscopia de

fotoemissão. Neste sentido, as características das diferentes técnicas de microscopia são complementares.

### 3.3. Imagens sem lente

Os microscópios mencionados anteriormente operam com base na espectroscopia de absorção, e a resolução espacial é determinada pelo sistema óptico de cada equipamento. Com raios X, também é possível gerar imagens sem o uso de lentes, utilizando padrões de difração coerente. Neste caso, a resolução espacial não é limitada pelo sistema óptico, mas sim pelo comprimento de onda da radiação. A difração convencional requer objetos ordenados periodicamente, como os átomos em uma estrutura cristalina. Como esta condição normalmente não é presente quando se estuda domínios magnéticos irregulares, o uso de raios X coerentes é muito importante para microscopias magnéticas. Fontes comuns de raios X produzem feixes incoerentes, sendo necessário filtrar seletivamente a fração coerente para obter radiação puramente coerente. A utilização de raios X monocromáticos permite a obtenção de coerência longitudinal, enquanto aberturas micrométricas (“pinholes”) podem ser usados para obter coerência transversal. Todavia, estes filtros necessários para extrair feixe coerente de uma fonte convencional diminuem drasticamente o fluxo de fótons. Desta forma, a baixa eficiência torna inviável um experimento dependente de raios X coerentes. Graças ao desenvolvimento de fontes de luz síncrotron extremamente brilhantes, tornou-se possível extrair feixes coerentes com altas intensidades, o que viabilizou o desenvolvimento de técnicas de imagem baseadas em difração coerente, sem uso de lentes, em linhas de luz de última geração. Mesmo que o padrão magnético seja desordenado, o espalhamento de diferentes domínios magnéticos dentro do comprimento de coerência pode interferir, e a partir do padrão de espalhamento resultante, chamado padrão de “speckles”, é possível calcular a estrutura do domínio no espaço real. Para reconstruir a imagem real a partir do padrão de espalhamento coerente no espaço recíproco, é necessário obter a informação da fase da onda. Todavia, apenas a intensidade é registrada no detector real, resultando na perda da fase. Para resolver o “problema da fase”, algoritmos de recuperação de fase são empregados para reconstruir a imagem real [16, 17]. Outra abordagem baseia-se na holografia de transformada de Fourier, onde um feixe de referência é utilizado para permitir que a informação da fase seja registrada como modulações de intensidade no detector [18].

## 4. Espalhamento Ressonante de Raios X

### 4.1. Espalhamento elástico

Bastante conhecida da comunidade que trabalha com amostras na forma de filmes finos, a técnica de refletividade de raios X (“X-ray reflectivity”, XRR),

tipicamente aplicada no regime de raios X duros, é utilizada para determinar o perfil de profundidade químico em heteroestruturas e multicamadas. Isso é possível por causa do contraste de densidade de carga entre camadas adjacentes. Com a possibilidade de escolher a energia do fóton em ressonância, coincidindo com uma borda de absorção de um elemento específico, a técnica ganha tanto seletividade resolvida em camadas quanto sensibilidade à estrutura química e eletrônica. Por sua vez, a utilização de fótons com polarização circular acrescenta o contraste magnético ao processo de espalhamento ressonante [19, 20]. Assim, um padrão de refletividade ressonante magnética de raios X (“X-ray resonant magnetic reflectivity”, XRMR) contém informações como as do XMCD na absorção, e também detalhes quantitativos sobre camadas enterradas e interfaces. O XRMR explora a dependência do fator de espalhamento atômico com o vetor de espalhamento, energia dos fótons incidentes, polarização dos feixes incidente e refletido, bem como amplitude e orientação da magnetização. O experimento consiste em medir duas curvas  $\theta - 2\theta$  utilizando-se polarização circular esquerda e direita, com energia fixa. De forma análoga ao experimento de XMCD, a análise é realizada considerando-se a diferença entre as medidas realizadas com diferentes polarizações. Assim, esta técnica pode ser utilizada para obter o perfil de profundidade magnético em multicamadas, contribuindo para a compreensão de efeitos de proximidade em interfaces, por exemplo [21]. Uma vez que o perfil de profundidade químico pode ser diferente do perfil magnético, dois modelos estruturais independentes podem ser necessários para simular o contraste químico e as respostas magnéticas.

A técnica de refletividade é um caso de espalhamento em geometria específica, onde o vetor de espalhamento está alinhado na direção fora do plano da amostra. De forma mais geral, a técnica de espalhamento ressonante magnético de raios X (“X-ray resonant magnetic scattering”, XRMS) pode explorar o espalhamento em condição não-especular e também em modo de transmissão. Por exemplo, em amostras com anisotropia perpendicular magnética formando padrões de domínio do tipo linha ou labirinto, a análise de padrões de espalhamento obtidos em diferentes geometrias permite investigar o vetor magnetização em três dimensões. Esta técnica tem sido bastante utilizada para investigar a distribuição espacial da magnetização em amostras com anisotropia perpendicular. Simulando a interação da radiação com modelos estruturais, através de comparação com resultados experimentais é possível extrair tamanhos e quiralidade de domínios de fechamento, periodicidade em amostras com domínios ordenados (linha), e tamanhos médios em amostras com padrões desordenados (labirinto). Todavia, a interação entre as propriedades ópticas, magnéticas e estruturais pode complicar consideravelmente a interpretação do sinal experimental, especialmente em torno de bordas de absorção onde as constantes ópticas apresentam variações significativas.

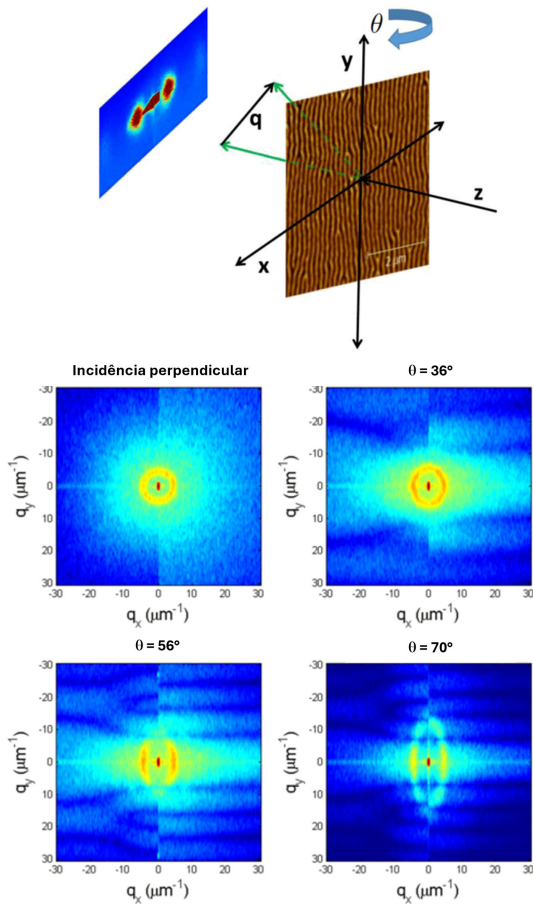

**Figura 5:** Na parte superior é representada a geometria de um experimento de XRMS em modo transmissão. A amostra é uma multicamada com anisotropia perpendicular magnética e padrão de domínios ordenados. O feixe se propaga ao longo da direção  $z$ , e um detector posicionado à frente da amostra mede o padrão de espalhamento. No centro e parte inferior são apresentados padrões de espalhamento simulados para diferentes ângulos de incidência, demonstrando a dependência do espalhamento ressonante com a geometria do experimento. Esta característica permite obter informações sobre a distribuição espacial da magnetização em três dimensões. Figura extraída e modificada, com autorização, da referência [22].

Desta forma, é necessário simular a resposta óptica para extrair informações úteis dos dados experimentais. Isso requer estimativas das constantes ópticas complexas dos materiais, incluindo efeitos magnéticos e a estrutura em camadas do sistema. A Figura 5 (superior) mostra a geometria de um experimento de XRMS em modo transmissão, onde o espaço recíproco de amostras com padrões de domínios ordenados (linhas) ou desordenados (labirinto) pode ser sondado. Os padrões de espalhamento apresentados na Figura 5 demonstram uma forte dependência com o ângulo de incidência do feixe em relação à superfície da multicamada. Através da simulação destes padrões, é possível obter informações sobre a distribuição espacial da magnetização em três dimensões [22].

## 4.2. Espalhamento inelástico

A técnica de espalhamento inelástico ressonante de raios X (“resonant inelastic X-ray scattering”, RIXS) pode acessar a relação de dispersão de excitações coletivas, como mágnons, na faixa de energia (frequência) de meV (THz). Mais especificamente, RIXS sonda como a energia, momento e polarização de um feixe incidente são transferidos para excitações neutras do material. Como a medida é realizada em ressonância, ou seja, com a energia do feixe incidente fixa e na região da borda de absorção de um dos elementos, é a única técnica que permite a caracterização quimicamente seletiva da estrutura magnônica de materiais compostos ou heteroestruturas. RIXS proporciona a vantagem única de caracterização dos diferentes graus de liberdade eletrônicos (carga, spin, orbital e estrutura atômica) em um mesmo experimento. Comparada a outras técnicas de espalhamento inelástico, o RIXS cobre uma ampla (e complementar) região tanto no espaço de energias (dezenas de meV até dezenas de eV) quanto no de momentos (na faixa de sub  $\text{\AA}^{-1}$ , dependendo da energia).

O RIXS se desenvolveu apenas com o advento dos síncrotrons de terceira geração a partir da década de 90, devido à necessidade de alto brilho e alta resolução. No Sirius, acelerador de luz síncrotron operado pelo Laboratório Nacional de Luz Síncrotron (LNLS) no Centro Nacional de Pesquisa em Energia e Materiais (CNPEM), que é um dos primeiros aceleradores de quarta geração, está em funcionamento um espectrômetro RIXS que deverá proporcionar resoluções no estado da arte nos próximos anos [23]. Apesar de já ser bastante utilizada para o estudo de mágnons em sistemas de elétrons fortemente correlacionados como cupratos supercondutores, a utilização da técnica para investigação de mágnons ópticos em materiais magnônicos ainda é incipiente, e há um enorme potencial a ser explorado nos próximos anos.

## 5. Discussão

As propriedades magnéticas e eletrônicas de materiais magnéticos tem sido amplamente estudadas utilizando técnicas baseadas em luz síncrotron. O dicroísmo magnético de raios X é uma ferramenta poderosa para quantificar momentos magnéticos de spin e orbital, com seletividade química. Além disso, é possível utilizar o contraste de XMCD para obter imagens de domínios magnéticos no espaço real, com resolução nanométrica, através de microscopias de raios X como PEEM, TXM e STXM. Por outro lado, técnicas de espalhamento ressonante de raios X, como XRMR e XRMS, oferecem informações precisas do espaço recíproco de filmes finos magnéticos enterrados e interfaces. É possível estimar tamanhos médios de domínios e paredes de domínio em três dimensões. Por sua vez, o desenvolvimento da técnica de RIXS apresenta um enorme potencial para estudar excitações coletivas como mágnons ópticos

de alta frequência. Muitas destas possibilidades estão disponíveis para a comunidade nas linhas de luz do Sirius (LNLS/CNPEM). Essas técnicas, em conjunto, possibilitam uma compreensão abrangente do magnetismo em diversos materiais. Sua aplicação não apenas avança o conhecimento fundamental, mas também impulsiona o desenvolvimento de novos dispositivos e tecnologias com aplicações em áreas diversas.

## Referências

- [1] F. de Groot, *Coord. Chem. Rev.* **249**, 31 (2005).
- [2] X. Cheng, *Multiplet computation methods for core level X-ray spectroscopy of transition metal and rare earth elements*. Licenciante Thesis, KTH Royal Institute of Technology, Stockholm (2023).
- [3] J. Stöhr, *NEXAFS Spectroscopy* (Springer, Berlin, 1992).
- [4] Y. Kudo, M. Horio, T. Sumi, T. Wada, Y. Hirata, T. Ohkochi, T. Kinoshita e I. Matsuda, *e-J. Surf. Sci. Nanotechnol.* **20**, 124 (2022).
- [5] G. van der Laan e A.I. Figueroa, *Coord. Chem. Rev.* **277-278**, 95 (2014).
- [6] B.T. Thole, P. Carra, F. Sette e G. van der Laan, *Phys. Rev. Lett.* **68**, 1943 (1992).
- [7] C.T. Chen, Y.U. Idzerda, H.J. Lin, N.V. Smith, G. Meigs, E. Chaban, G.H. Ho, E. Pellegrin e F. Sette, *Phys. Rev. Lett.* **75**, 152 (1995).
- [8] J. Goulon, C. Goulon-Ginet, A. Rogalev, V. Gotte, C. Malgrange e C. Brouder, *J. Chem. Phys.* **108**, 6394 (1998).
- [9] D.A. Dugato, J. Brandão, F. Béron, R.B. da Silva, S. Flewett, D.A. Shapiro, J.C. Cezar, L.S. Dorneles e T.J.A. Mori, *J. Magn. Magn. Mater* **566**, 170305 (2023).
- [10] L.T. Coutrim, D. Rigitano, C. Macchiutti, T.J.A. Mori, R. Lora-Serrano, E. Granado, E. Sadrollahi, F.J. Litterst, M.B. Fontes, E. Baggio-Saitovitch, et al., *Phys. Rev. B* **100**, 054428 (2019).
- [11] A. Locatelli e E. Bauer *J. Phys. Condens. Matter* **20**, 093002 (2008).
- [12] G. Denbeaux, E. Anderson, W. Chao, T. Eimüller, L. Johnson, M. Köhler, C. Larabell, M. Legros, P. Fischer, A. Pearson et al., *Nucl. Instrum. Meth. Phys. Res. A* **467-468**, 841 (2001).
- [13] P. Fischer, T. Eimüller, G. Schütz, G. Denbeaux, A. Pearson, L. Johnson, D. Attwood, S. Tsunashima, M. Kumazawa, N. Takagi et al., *Rev. Sci. Instrum.* **72**, 2322 (2001).
- [14] J. Kirz e H. Rarback, *Rev. Sci. Instrum.* **56**, 1 (1985).
- [15] A.L.D. Kilcoyne, T. Tylliszczak, W.F. Steele, S. Fakra, P. Hitchcock, K. Franck, E. Anderson, B. Harteneck, E.G. Rightor, G.E. Mitchell et al., *J. Synchrotron Radiat.* **10**, 125 (2003).
- [16] D. Sayre, *Acta Crystallogr.* **5**, 60 (1952).
- [17] J.W. Miao, P. Charalambous, J. Kirz e D. Sayre, *Nature* **400**, 342 (1999).
- [18] S. Eisebitt, J. Lüning, W.F. Schlotter, M. Lörger, O. Hellwig, W. Eberhardt, J. Stöhr, *Nature* **432**, 885 (2004).
- [19] F. Bergevin e M. Brunel, *Phys. Lett. A* **39**, 141 (1972).
- [20] F. Bergevin e M. Brunel, *Acta Cryst. A* **37**, 314 (1981).
- [21] C. Swindells, B. Nicholson, O. Inyang, Y. Choi, T. Hase e D. Atkinson, *Phys. Rev. Research* **2**, 033280 (2020).
- [22] S. Flewett, D. Mishra, T.J.A. Mori, C.M. Günther, J.C. Denardin, S. Oyarzún, S. Michea, D. Engel, M. Fohler, T.C.R. Rocha et al., *Phys. Rev. B* **95**, 094430 (2017).
- [23] G.L.M.P. Rodrigues, M. Guarise, A. Rocha, B. Meyer e T.C.R. Rocha, *AIP Conf. Proc.* **2054**, 040007 (2019).
- [24] J. Pelliciari, S. Lee, K. Gilmore, J. Li, Y. Gu, A. Barbour, I. Jarrige, C.H. Ahn, F.J. Walker, V. Bisogni, *Nat. Mater.* **20**, 188 (2021).
